# Supplementary material for: Constructing a novel three-dimensional scaffold with mesoporous TiO2 nanotubes for potential bone tissue engineering
Source: Royal Society of Chemistry journal article supplement (doi:10.1039/c5tb00609k), 2015-01-01
Supplement: c5tb00609k1.pdf [file c5tb00609k1.pdf]

## Supporting Information

### **Constructing a novel three-dimensional scaffold with mesoporous TiO<sub>2</sub> nanotubes for potential bone tissue engineering**

Yizao Wan <sup>a,b</sup>, Peng Chang <sup>a</sup>, Zhiwei Yang <sup>a</sup>, Guangyao Xiong <sup>\*b</sup>, Ping Liu <sup>a</sup>, Honglin  
Luo <sup>\*a</sup>

<sup>a</sup> *School of Materials Science and Engineering, Tianjin University, Tianjin Key  
Laboratory of Composite and Functional Materials, Tianjin 300072, China*

<sup>b</sup> *School of Mechanical and Electrical Engineering, East China Jiaotong University,  
Nanchang 330013, China*

Authors for correspondence:

Prof. Guangyao Xiong, xionguangyao@163.com

Dr. Honglin Luo, hlluotju@126.com

**Table S1** Pore structure parameters of TiO<sub>2</sub> nanotube scaffold.

| Samples                               | BET surface area<br>(m <sup>2</sup> g <sup>-1</sup> ) | Pore volume<br>(cm <sup>3</sup> g <sup>-1</sup> ) | Mesopore size<br>(nm) |
|---------------------------------------|-------------------------------------------------------|---------------------------------------------------|-----------------------|
| BC aerogel                            | 149.9                                                 | 0.8954                                            | 13.73                 |
| TiO <sub>2</sub> /BC aerogel          | 82.5                                                  | 0.1180                                            | 3.50                  |
| TiO <sub>2</sub> nanotube<br>scaffold | 1629.0                                                | 2.565                                             | 3.30                  |

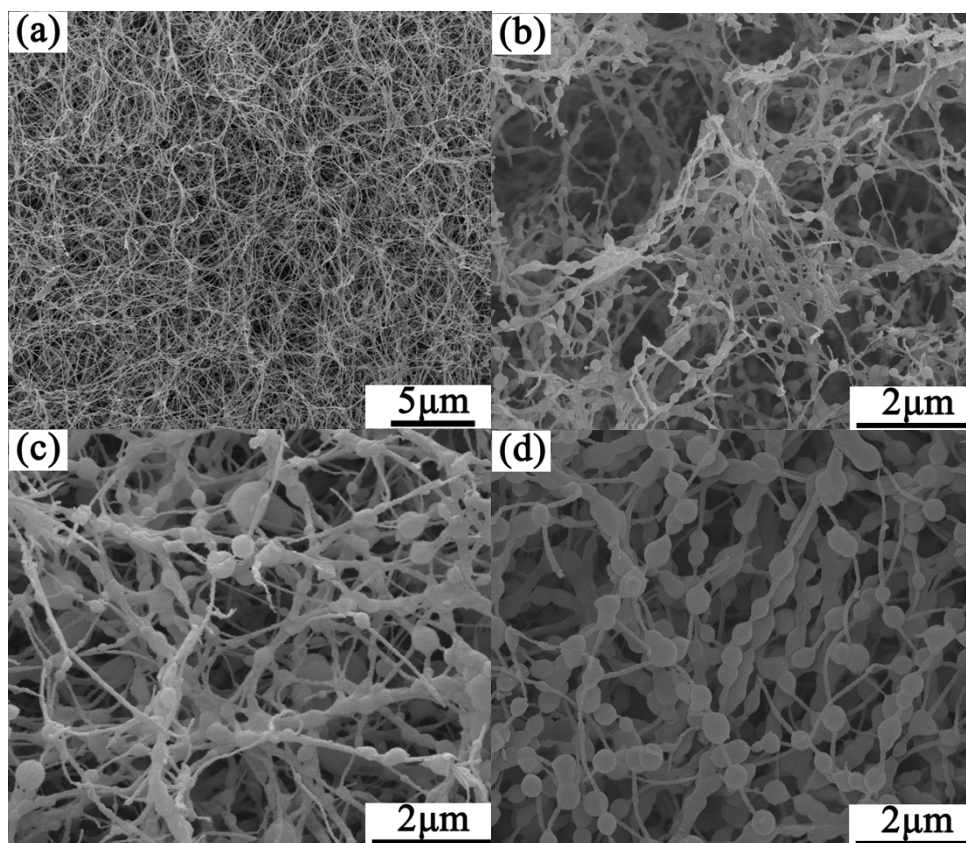

**Fig. S1** SEM images of pristine BC (a) and BC/TiO<sub>2</sub> hybrids synthesized in ethanol with different Ti(OBu)<sub>4</sub> concentrations ((b) 0.1 M, (c) 0.5, (d) 1.0 M).

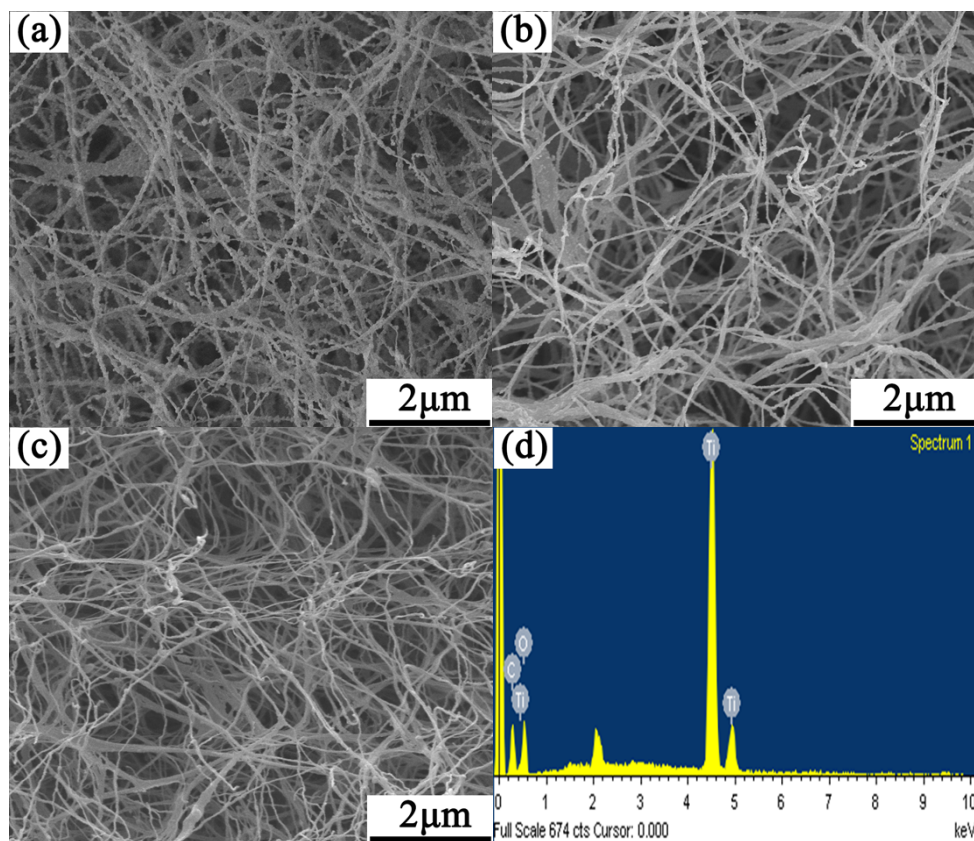

**Fig. S2** SEM images of BC/TiO<sub>2</sub> hybrids synthesized in isopropanol with different Ti(OBu)<sub>4</sub> concentrations ((a) 0.1 M, (b) 0.5 M, (c) 1.0 M) and EDS spectrum from the sample synthesized at 1.0 M (d).

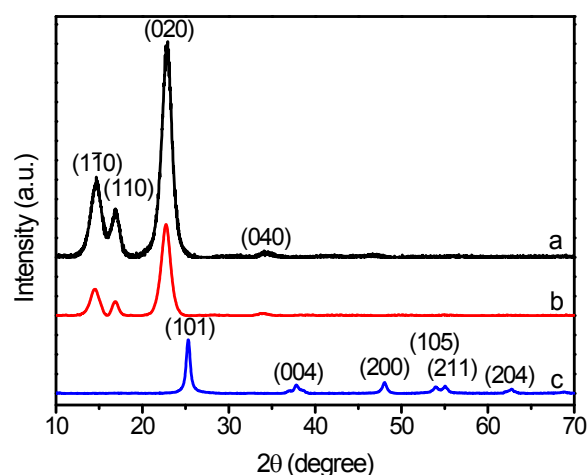

**Fig. S3** XRD patterns of BC (a), TiO<sub>2</sub>/BC hybrid (b), and TiO<sub>2</sub> nanotubes calcined at 600 °C (c).

BC shows three main peaks at around 14.6, 16.9, and 22.9 °, corresponding to the crystalline planes of (110), (110), and (020) planes of cellulose type I.<sup>2,3</sup> The intensity of these peaks in the spectrum of TiO<sub>2</sub>/BC hybrid is much lower due to the presence of TiO<sub>2</sub> coating. The absence of the diffraction peaks of TiO<sub>2</sub> indicates the amorphous nature of the TiO<sub>2</sub> on BC nanofibers. In the spectrum of TiO<sub>2</sub> nanotubes calcined at 600 °C for 6 h, the transformation from amorphous to crystalline TiO<sub>2</sub> is demonstrated through the detection of the six characteristic peaks assigned to diffraction planes of (101), (004), (200), (105), (211), and (204) of anatase TiO<sub>2</sub> (JCPDS 21-1272). This is understandable since titania obtained through sol-gel hydrolysis is amorphous and crystallization can be induced by heat treatment.<sup>4</sup>

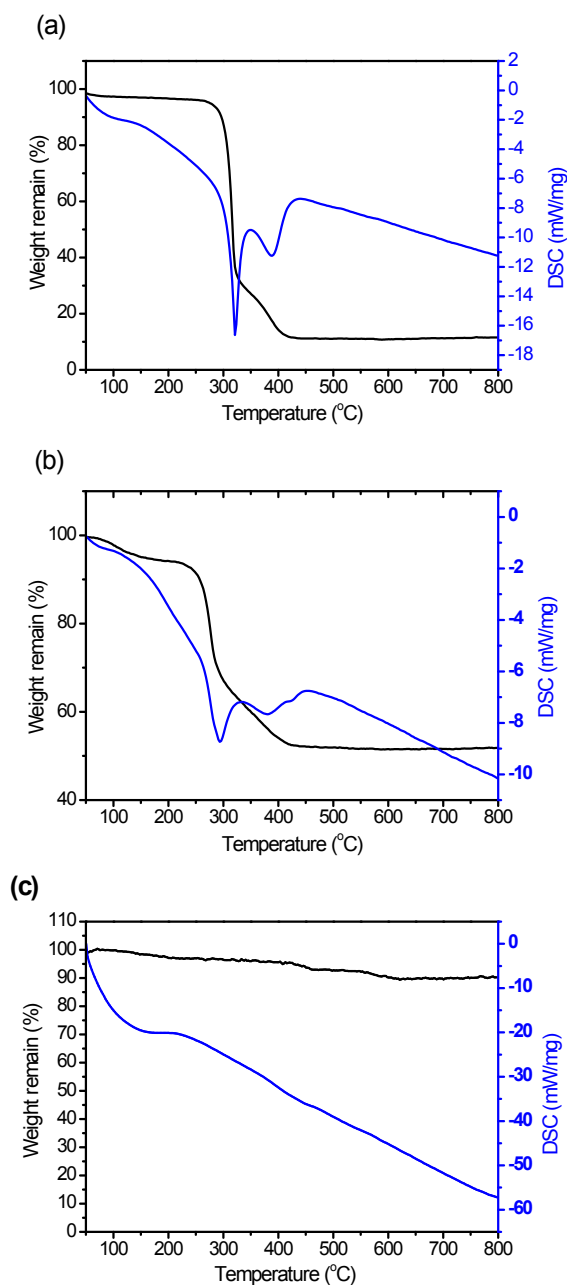

**Fig. S4** TGA-DSC curves of BC (a), BC/TiO<sub>2</sub> (b), and TiO<sub>2</sub> nanotubes (c).

BC experiences two continuous weight loss steps in the range of 290–330 °C and 330–432 °C, respectively, accompanied with two endothermic peaks at about 321 and 388 °C in the DSC curve (Fig. S4a). The thermal degradation of BC was ascribed to dehydration, depolymerization, and decomposition of glycosyl units followed by the formation of a charred residue.<sup>5, 6</sup> Unlike pristine BC, BC/TiO<sub>2</sub> hybrid shows three-

step weight-losses. The slight weight-loss before 170 °C is ascribed to the loss of adsorbed and bonded water. The biggest and fastest weight loss that occurred in the range of 251–297 °C with an endothermic peak at about 294 °C is due to the thermal degradation of BC fibers. The last weight loss in 306–421 °C range with an endothermic peak at about 381 °C is the thermal degradation of BC fibers. Note that the decomposition temperature of BC/TiO<sub>2</sub> hybrid has shifted from about 290 °C to about 251 °C (Fig. S4b), suggesting earlier thermal decomposition of BC in the presence of TiO<sub>2</sub> coating, which is similar to the promotion of gold and TiO<sub>2</sub> nanoparticles on cellulose because of their catalytic effects.<sup>7, 8</sup> For TiO<sub>2</sub> nanotubes, the weight loss up to 800 °C is only about 9% (Fig. S4c), indicating good thermal stability of TiO<sub>2</sub> nanotubes.

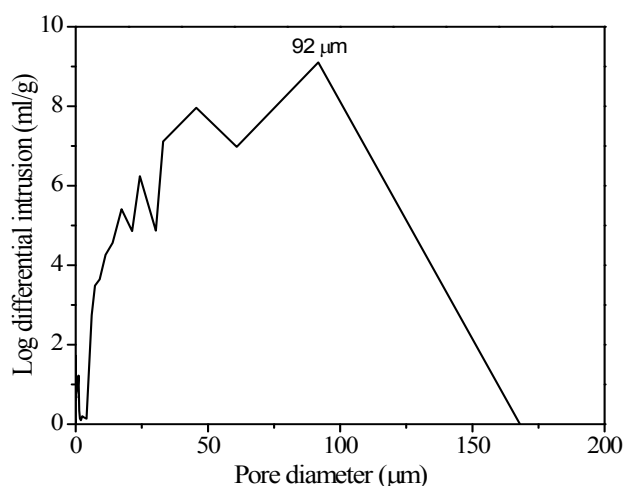

**Fig. S5** Pore size distribution of TiO<sub>2</sub> nanotube scaffold measured by mercury intrusion porosimetry.

## References

1. Y. Z. Wan, Y. Huang, C. D. Yuan, S. Raman, Y. Zhu, H. J. Jiang, F. He and C. Gao, *Mater. Sci. Engin. C*, 2007, **27**, 855-864.
2. C. Tokoh, K. Takabe, M. Fujita and H. Saiki, *Cellulose*, 1998, **5**, 249-261.
3. H. Luo, G. Xiong, Z. Yang, S. R. Raman, H. Si and Y. Wan, *RSC Adv.*, 2014, **4**, 14369-14372.
4. J.-P. Hsu and A. Nacu, *Langmuir*, 2003, **19**, 4448-4454.
5. H. S. Barud, A. M. de Araújo Júnior, D. B. Santos, R. de Assunção, C. S. Meireles, D. A. Cerqueira, G. Rodrigues Filho, C. A. Ribeiro, Y. Messaddeq and S. J. L. Ribeiro, *Thermochim. Acta*, 2008, **471**, 61-69.
6. M. Ul-Islam, T. Khan and J. K. Park, *Carbohydr. Polym.*, 2012, **89**, 1189-1197.
7. J. Cai, S. Kimura, M. Wada and S. Kuga, *Biomacromolecules*, 2009, **10**, 87-94.
8. J. Zeng, S. Liu, J. Cai and L. Zhang, *J. Phys. Chem. C*, 2010, **114**, 7806-7811.
